# Supplementary material
Source: PubMed Central journal article supplement (PMC7809794)
Supplement: EMBJ-40-e104450-s001.pdf [file EMBJ-40-e104450-s001.pdf]

**APPENDIX**

**Appendix Table S1: Primary antibodies used in the study .....page 2**

**Appendix Table S1: Primary antibodies used in the study**

IF: Immunofluorescence; WB: Western blotting

| <b>Antigen</b>                     | <b>Host</b> | <b>Supplier</b> | <b>Cat No</b> | <b>IF Dilution</b> | <b>WB Dilution</b> |
|------------------------------------|-------------|-----------------|---------------|--------------------|--------------------|
| ADAM10                             | Rabbit      | Abcam           | ab1997        | -                  | 1:2000             |
| APP (Y188)                         | Rabbit      | Abcam           | ab32136       | -                  | 1:2000             |
| APP-CTF                            | Rabbit      | Sigma           | A8717         | -                  | 1:2000             |
| A $\beta$ (1-16), 6E10             | Mouse       | Biologend       | 803002        | 1:1000             | 1:2000             |
| BACE1                              | Rabbit      | Sigma           | SAB2100200    | 1:200              | 1:2000             |
| Cleaved caspase-3 (D175)           | Rabbit      | Cell Signaling  | 9661L         | 1:200              | -                  |
| GAPDH                              | Rabbit      | Sigma           | G9545         | -                  | 1:6000             |
| GFAP                               | Rabbit      | Abcam           | ab7260        | 1:500              | -                  |
| Iba1                               | Rabbit      | Wako            | 019-19741     | 1:500              | -                  |
| MAP2                               | Chicken     | Abcam           | ab8392        | 1:1000             | -                  |
| p75 <sup>NTR</sup> (extracellular) | Rabbit      | Merck           | AB1554        | 1:200              | -                  |
| p75 <sup>NTR</sup> (extracellular) | Goat        | Neuromics       | GT15057       | 1:500              | 1:1000             |
| Rab11                              | Rabbit      | Abcam           | ab3612        | 1:200              | -                  |
| RTN3 (R458)                        | Rabbit      | Merck           | ABN1723       | 1:1000             | -                  |
